# Supplementary material for: Myricanol Inhibits Platelet Derived Growth Factor-BB-Induced Vascular Smooth Muscle Cells Proliferation and Migration in vitro and Intimal Hyperplasia in vivo by Targeting the Platelet-Derived Growth Factor Receptor-β and NF-κB Signaling
Source: Frontiers journal article supplement (doi:10.3389/fphys.2021.790345), 2022-02-03
Supplement: Data_Sheet_1.pdf [file Data_Sheet_1.pdf]

## **Materials and methods**

### **Immunofluorescence analysis**

For cells cultured in plates, cells were fixed in 4% formaldehyde for 30 minutes and immunostained with  $\alpha$ -SMA (proteintech 14395-1-AP) antibodies overnight at 4°C, then incubated with the indicated secondary antibodies for 1 hours at 37°C. Nuclei were stained with DAPI for 20 minutes at 37°C. Photos were taken under a fluorescence microscope (Olympus).

For sections harvested from animal model, the paraffin-embedded common carotid arteries were sectioned in increments of 6  $\mu$ m and immunostained with Ki67 (ab15580; Abcam) and F4/80 antibodies (ab5694; Abcam) overnight at 4°C, then incubated with the indicated secondary antibodies for 1 hours at 37°C. Nuclei were stained with DAPI for 20 minutes at 37°C. Photos were taken under a fluorescence microscope (Olympus).

### **LDH assay**

The level of LDH in cell culture supernatants was assayed by using LDH Cytotoxicity Assay Kit (beyotime C0016) according to the manufacturer's instructions. In brief, VSMCs were cultured in 96-well culture plates ( $2 \times 10^4$  cells/well) and treated with indicated concentrations of Myricanol or vehicle for 24 h. Then 60  $\mu$ l cell-free supernatant was incubated with 120  $\mu$ l LDH substrate solution for 30 min, and the absorbance at 490 nm was measured by using a microplate spectrophotometer. The LDH release rate was calculated:  $[\text{OD}_{\text{sample}} - \text{OD}_{\text{blank}}]/[\text{OD}_{\text{Triton X-100}} - \text{OD}_{\text{blank}}]$ .

### **Zymography assay**

The VSMCs were cultured into six-well plates at a density of  $1 \times 10^6$  cells/well. After being pretreated with indicated concentrations of Myricanol or vehicle for 30 min in starvation conditions, the cells were stimulated by PDGF-BB (30 ng/ml) for 24 h. Culture supernatants were collected and centrifuged at 9700 g for 1 min at 4 °C. Same amount of supernatants (25  $\mu$ L) of each group were prepared for next step. Then

Zymography assay were performed following the manufacturer's instructions of the MMP Zymography assay kit (Applygen P1700).

## **Figures**

**Supplementary Figure 1 Immunofluorescence staining of  $\alpha$ -SMA in Primary VSMCs.** Primary VSMCs were isolated from the thoracic aortas of SD rats. VSMCs were stained with  $\alpha$ -SMA (red) and DAPI (blue). Scale bar, 20  $\mu$ m

**Supplementary Figure 2 Effects of Myricanol on PDGF-BB-induced apoptosis and necrosis assays in VSMCs.** (A) After being pretreated with indicated concentrations of myricanol or vehicle for 30 min, the cells were stimulated by PDGF-BB (30 ng/ml) for 24 h. The protein level of Caspase 3, Cleaved caspase 3, BAX and BCL2 were determined by Western blot analysis. Data are represented as mean $\pm$ SEM (n=3) (B) VSMCs were treated with indicated concentrations of myricanol or vehicle for 24 h and LDH in cell culture supernatants was assayed. Data are represented as mean $\pm$ SEM (n=4).

**Supplementary Figure 3 Effects of Myricanol on PDGF-BB-induced MMP2 and MMP9 activity in VSMCs.** The activity of MMP2 and MMP9 were detected by Zymography assays.

**Supplementary Figure 4 The specific inhibitors for PDGFR $\alpha$ , PDGFR $\beta$ , JNK, ERK1/2 and p38 were provided to reveal the specificity of myricanol on PDGFR $\beta$  signaling pathways.** (A) The protein level of the phosphorylation of PDGFR $\alpha$ , PDGFR $\beta$  and downstream MAPKs were determined by Western blot analysis, while the specific inhibitors for PDGFR $\alpha$  (AP24534) and PDGFR $\beta$  (SU11248) were provided. (B) The protein level of the phosphorylation of PDGFR $\beta$  and downstream MAPKs were determined by Western blot analysis, while the specific inhibitors for JNK (JNK-IN-8), ERK1/2 (PD98059) and p38 (SB203580) were provided. Data are represented as mean $\pm$ SEM (n=3). \*P<0.05, \*\*P<0.01 versus

the Vehicle group.

**Supplementary Figure 5 Effect of Myricanol on carotid artery ligation induced proliferation and macrophage infiltration.** (A-B) Effect of Myricanol on proliferation in vivo was assayed by Immunofluorescence staining of Ki67 (red) and DAPI (blue). (C-D) Immunofluorescence staining for F4/80 (red) and DAPI (blue) was performed to analysis macrophage infiltration in vivo. Data are represented as mean $\pm$ SEM (n=3). Scale bar, 50  $\mu$ m. ###P<0.01 versus the Sham+Vehicle group. \*P<0.05, \*\*P<0.01 versus the Injured+Vehicle group.
